# Supplementary material for: Genetic Screen in Adult Drosophila Reveals That dCBP Depletion in Glial Cells Mitigates Huntington Disease Pathology through a Foxo-Dependent Pathway
Source: Int J Mol Sci. 2021 Apr 9;22(8):3884. doi: 10.3390/ijms22083884 (PMC8069648; doi:10.3390/ijms22083884)
Supplement: Supplementary file 1 [file ijms-22-03884-s001.zip]

Archive with 6 entries (5 files):
- ijms-1110775-sup-original/
- ijms-1110775-sup-original/supplementary figures.pdf
- ijms-1110775-sup-original/Tab S1.xlsx
- ijms-1110775-sup-original/Tab S2.xlsx
- ijms-1110775-sup-original/Tab S3.xlsx
- ijms-1110775-sup-original/Tab S4.xlsx
