# Supplementary material for: Genetic Screen in Adult Drosophila Reveals That dCBP Depletion in Glial Cells Mitigates Huntington Disease Pathology through a Foxo-Dependent Pathway
Source: Int J Mol Sci. 2021 Apr 9;22(8):3884. doi: 10.3390/ijms22083884 (PMC8069648; doi:10.3390/ijms22083884)
Supplement: Supplementary file 1 [file ijms-22-03884-s001.zip › ijms-1110775-sup-original/Tab S1.xlsx]

## Sheet: Feuil1
Type	Fly_Symbol	FlyBaseID	Human_Symbol	Weighted_Score
Others-Adenosine signaling	Adgf-A	FBgn0036752	ADA2	12.72
Others-Adenosine signaling	AdoR	FBgn0039747	ADORA2B	7.83
Others-Immunity_Inflammation	akirin	FBgn0082598	AKIRIN2	13.8
Signal transduction	alph	FBgn0086361	PPM1A_B	7.736
Others-Metabolism	AMPKalpha	FBgn0023169	PRKAA1	5.733
Signal transduction	aop	FBgn0000097	ETV6	6.674
Wnt signaling	Apc	FBgn0015589	APC	8.75
Wnt signaling	arm	FBgn0000117	CTNNB1	8.709
polyQ modifier	Atx2	FBgn0041188	ATXN2	6.715
Others-Gene silencing by RNA	aub	FBgn0000146	PIWIL1	4.784
Wnt signaling	Axn	FBgn0026597	AXIN1	8.709
Others	bru2	FBgn0262475	CELF2	9.85
Calcium signaling & regulation	CanA1	FBgn0010015	PPP3CB	4.741
Calcium signaling & regulation	CanA-14F	FBgn0267912	PPP3CB	6.759
Calcium signaling & regulation	CanB	FBgn0010014	PPP3R1	4.939
Others-stress granules & RNA splicing	caz	FBgn0285954	FUS	6.696
Interactor Htt	Cbs	FBgn0031148	CBS	8.666
Others	Ccn	FBgn0052183	CTGF	4.703
Signal transduction	Cdk5	FBgn0013762	CDK5	13.8
Signal transduction	Cdk5alpha	FBgn0027491	CDK5R1	11.83
Others-glial activation pathway	ced-6	FBgn0029092	GULP1	7.699
Others	CG12299	FBgn0032295	ZNF366	1.913
Interactor Htt	CG12301	FBgn0036514	UTP14A	9.669
Signal transduction	CG13994	FBgn0031772	PPP1R11	10.89
Others-Transporters	CG1607	FBgn0039844	SLC7A6	3.794
Others-Metabolism	CG1640	FBgn0030478	GPT	6.736
Others	CG1673	FBgn0030482	BCAT1	13.8
polyQ modifier	CG17931	FBgn0038421	SERF1B	4.701
Others-Transporters	CG30394	FBgn0050394	SLC38A3	1.003
Interactor Htt	CG42724	FBgn0261641	TCERG1	6.694
Kynurenine pathway	cn	FBgn0000337	KMO	13.74
CREB pathway	CrebA	FBgn0004396	CREB3L2	9.83
CREB pathway	CrebB	FBgn0265784	CREB1	12.74
CREB pathway	Crtc	FBgn0036746	CRTC1	8.91
Signal transduction	csw	FBgn0000382	PTPN11	11.77
Wnt signaling	CtBP	FBgn0020496	CTBP2	13.8
polyQ modifier	Dgkepsilon	FBgn0020930	DGKE	12.79
polyQ modifier	DnaJ-1	FBgn0263106	DNAJB1	6.709
Signal transduction	dos	FBgn0016794	GAB2	4.753
Signal transduction	drk	FBgn0004638	GRB2	7.736
Wnt5 receptor	drl	FBgn0015380	RYK	11.79
Wnt5 receptor	Drl-2	FBgn0033791	RYK	7.83
Mitochondrial fission	Drp1	FBgn0026479	DNM1L	8.709
Others-glial activation pathway	drpr	FBgn0027594	MEGF10	11.91
Interactor Htt	EndoA	FBgn0038659	SH3GL3	8.709
Others-Adenosine signaling	Ent2	FBgn0263916	SLC29A3	7.83
Interactor Htt	faf	FBgn0005632	USP9X	8.709
Energy production related metabolic process	fbp	FBgn0032820	FBP1	8.693
Signal transduction	flw	FBgn0000711	PPP1CB	12.8
Insulin pathway	Foxo	FBgn0038197	FOXO3	8.95
Others-Metabolism	Gad1	FBgn0004516	GAD1	8.693
Energy production related metabolic process	Gapdh1	FBgn0001091	GAPDH	8.709
Others-Transporters	gb	FBgn0039487	SLC7A5	2.834
Interactor Htt	Gbeta13F	FBgn0001105	GNB1	8.709
Others-Metabolism	Gbs-70E	FBgn0036428	PPP1R3C	10.78
Others-Transporters	GC1	FBgn0260743	SLC25A22	13.82
Wnt signaling	Gint3	FBgn0034372	UBXN6	12.79
Energy production related metabolic process	GlyP	FBgn0004507	PYGM	8.693
Others-Metabolism	GlyS	FBgn0266064	GYS1	8.693
Wnt signaling	gro	FBgn0001139	TLE4	11.79
Others-Metabolism	Gs1	FBgn0001142	GLUL	4.666
Others-Metabolism	Gs2	FBgn0001145	GLUL	8.693
polyQ modifier	HDAC1	FBgn0015805	HDAC1	9.669
Calcium signaling & regulation	Hsc70-5	FBgn0001220	HSPA9	9.669
polyQ modifier	Hsc70Cb	FBgn0026418	HSPA4	7.709
polyQ modifier	Hsp68	FBgn0001230	HSPA1A	3.831
polyQ modifier	HSPA4L		HSPA4L
Interactor Htt	Htt	FBgn0027655	HTT	11.83
Insulin pathway	InR	FBgn0283499	IGF1R	11.9
Interactor Htt	IRSp53	FBgn0052082	BAIAP2	9.89
Calcium signaling & regulation	Itpr	FBgn0010051	ITPR1	7.699
Others-Transporters	JhI-21	FBgn0028425	SLC7A5	5.731
Others	kis	FBgn0266557	CHD7	9.8
Signal transduction	ksr	FBgn0015402	KSR1	5.717
Wnt signaling	kto	FBgn0001324	MED12L	11.78
Kynurenine pathway	Kyat	FBgn0037955	CCBL2	7.759
Others-Metabolism	Ldh	FBgn0001258	LDHA	7.736
Calcium signaling & regulation	MCU	FBgn0042185	MCU	8.709
Energy production related metabolic process	Mdh1	FBgn0262782	MDH1	8.709
Others	Mgstl	FBgn0025814	MGST1	8.719
Calcium signaling & regulation	MICU1	FBgn0031893	MICU1	9.669
Signal transduction	MKP-4	FBgn0031044	DUSP12	8.693
Others-Transporters	mnd	FBgn0002778	SLC7A7	3.925
Signal transduction	mts	FBgn0004177	PPP2CB	8.719
Energy production related metabolic process	Nc73EF	FBgn0010352	OGDH	8.693
dCBP	nej	FBgn0261617	CREBBP	11.79
Signal transduction	NiPp1	FBgn0026402	PPP1R8	13.74
Calcium signaling & regulation	Orai	FBgn0041585	ORAI1	9.669
Interactor Htt	p53	FBgn0039044	TP63	7.82
Wnt signaling	pan	FBgn0085432	TCF7L2	7.84
Insulin pathway	Pdk1	FBgn0020386	PDPK1	12.75
Energy production related metabolic process	Pfk	FBgn0003071	PFKM	7.693
Energy production related metabolic process	Pgi	FBgn0003074	GPI	8.693
Others	PICK1	FBgn0032447	PICK1	12.77
Others-Gene silencing by RNA	piwi	FBgn0004872	PIWIL2	3.781
Signal transduction	Pka-R2	FBgn0022382	PRKAR2A	8.709
Signal transduction	pnt	FBgn0003118	ETS1	8.85
Signal transduction	Pp1-87B	FBgn0004103	PPP1CC	13.8
Insulin pathway	Pten	FBgn0026379	PTEN	12.79
Signal transduction	Ptpa	FBgn0016698	PPP2R4	7.688
Signal transduction	PTP-ER	FBgn0016641	PTPN5	3.805
Others-Pvr pathway	Pvf2	FBgn0031888	VEGFC	1.92
Others-Pvr pathway	Pvr	FBgn0032006	KDR	9.84
Wnt signaling	pygo	FBgn0043900	PYGO2	7.91
Interactor Htt	PyK	FBgn0267385	PKM	7.759
Interactor Htt	Rab5	FBgn0014010	RAB5B	7.709
Others	Rbfox1	FBgn0052062	RBFOX1	6.709
Others-Immunity_Inflammation	Rel	FBgn0014018	NFKB1	6.705
Others-stress granules & RNA splicing	Rox8	FBgn0005649	TIAL1	8.668
Others	rtp	FBgn0087005	MORN4	9.669
Calcium signaling & regulation	RyR	FBgn0011286	RYR1	13.75
Others-Transporters	sbm	FBgn0030574	SLC7A9	8.693
Energy production related metabolic process	SdhA	FBgn0261439	SDHA	9.669
Energy production related metabolic process	SdhB	FBgn0014028	SDHB	9.669
Others	sens-2	FBgn0051632	GFI1B	7.65
Calcium signaling & regulation	SERCA	FBgn0263006	ATP2A2	6.716
Others-Transporters	Sh	FBgn0003380	KCNA3	7.759
Others-glial activation pathway	Shark	FBgn0015295	ZAP70	6.9
Others	Sirt6	FBgn0037802	SIRT6	12.84
Wnt signaling	skd	FBgn0003415	MED13	14.75
Signal transduction	Sos	FBgn0001965	SOS1	8.693
Signal transduction	spi	FBgn0005672	NRG1	2
Mitochondria biogenesis	srl	FBgn0037248	PPARGC1A	3.763
Calcium signaling & regulation	Stim	FBgn0045073	STIM1	8.659
Interactor Htt	Synd	FBgn0053094	PACSIN2	6.778
Interactor Htt	Taf4	FBgn0010280	TAF4	9.86
Others	Thd1	FBgn0026869	TDG	9.68
Others-Immunity_Inflammation	Tspo	FBgn0031263	TSPO	13.8
Signal transduction	tws	FBgn0004889	PPP2R2D	14.75
Others-Immunity_Inflammation	upd3	FBgn0053542	_
Others-Kyurenine pathway	v	FBgn0003965	TDO2	14.75
Others	vvl	FBgn0086680	POU3F2	10.79
Signal transduction	wdb	FBgn0027492	PPP2R5E	12.71
Wnts	Wnt4	FBgn0010453	WNT9B	4.746
Wnts	Wnt5	FBgn0010194	WNT5B	2.914
Signal transduction	wrd	FBgn0042693	PPP2R5C	12.77
Others-Transporters	zyd	FBgn0265767	_
