# Supplementary material for: Genetic Screen in Adult Drosophila Reveals That dCBP Depletion in Glial Cells Mitigates Huntington Disease Pathology through a Foxo-Dependent Pathway
Source: Int J Mol Sci. 2021 Apr 9;22(8):3884. doi: 10.3390/ijms22083884 (PMC8069648; doi:10.3390/ijms22083884)
Supplement: Supplementary file 1 [file ijms-22-03884-s001.zip › ijms-1110775-sup-original/Tab S2.xlsx]

## Sheet: Feuil1
Type	Gene	Genotype	N	MLS	Ratio to control	SD
Modulators of neuronal polyQ induced toxicity
polyQ modifier	Atx2	repoGS> Htt-548-128Q / Atx2{v108843}	1	10.62	0.803784
polyQ modifier	Atx2	repoGS> Htt-548-128Q / Atx2 {v34955}	1	10.65	0.806055
polyQ modifier	CG17931	repoGS> Htt-548-128Q / CG17931[EY09918]	1	12.07	0.985014
polyQ modifier	Dgkepsilon	repoGS> Htt-548-128Q / Dgkepsilon (TRiP.GL00251)	1	11.29	0.959538
polyQ modifier	DnaJ-1	repoGS> Htt-548-128Q / UAS-DNAJB1.K}2	1	17.46	1.32148
polyQ modifier	HDAC1	repoGS> Htt-548-128Q / HDAC1 {v30599}	2	14.13	1.06944	0.038533
polyQ modifier	Hsc70Cb	repoGS> Htt-548-128Q / UAS-Hsc70Cb.K}2	1	18.68	1.41381
polyQ modifier	HSP68	repoGS> Htt-548-128Q / UAS-HSP68	1	18.25	1.38127
polyQ modifier	HSPA4L	repoGS> Htt-548-128Q / UAS-HSPA4L.K}2	1	12.01	0.908988
Interactor Htt	Cbs	repoGS> Htt-548-128Q / Cbs[EY04457]	2	13.785	1.04333	0.00481662
Interactor Htt	CG12301	repoGS> Htt-548-128Q / CG12301{TRiP.JF03348}	1	11.64	0.989284
Interactor Htt	CG42724	repoGS> Htt-548-128Q / CG42724{TRiP.HMS00621}	3	8.53333	0.682573	0.0507553
Interactor Htt	EndoA	repoGS> Htt-548-128Q / EndoA[EY02730]	1	12.63	0.955913
Interactor Htt	faf	repoGS> Htt-548-128Q / UAS-faf.H}2; st[1] faf[BX4]	1	11.58	0.876443
Interactor Htt	Gbeta13F	repoGS> Htt-548-128Q / Gbeta13F {TRiP.HMS01455}	3	11.9333	0.980372	0.164313
Interactor Htt	Htt	repoGS> Htt-548-128Q / UAS-Htt-548-0Q	2	19.91	1.50691	0.0813474
Interactor Htt	IRSp53	repoGS> Htt-548-128Q / CG32082{TRiP.HMC02920}	1	12.68	1.00373
Interactor Htt	p53	repoGS> Htt-548-128Q / UAS-p53	1	16.93	0.913097
Interactor Htt	p53	repoGS> Htt-548-128Q, p53[5a1.4]/ p53[5a1.4]	1	12.95	1.05683
Interactor Htt	p53	repoGS> Htt-548-128Q, p53[5a1.4] / w	1	13.6	1.10987
Interactor Htt	PyK	repoGS> Htt-548-128Q / Pyk {v49533}	1	14.41	1.09063
Interactor Htt	Pyk	repoGS> Htt-548-128Q / PyK{TRiP.GL00099}	4	17.7125	1.43529	0.110325
Interactor Htt	Rab5	repoGS> Htt-548-128Q / Rab5{v103945}	1	6.29	0.476064
Interactor Htt	Rab5	repoGS> Htt-548-128Q / UAS-GFP-Rab5	1	14.47	1.09518
Interactor Htt	Rab5	repoGS> Htt-548-128Q / Rab5[GSV1-C676]	1	14.95	1.1315
Interactor Htt	Synd	repoGS> Htt-548-128Q / Synd[MI06666]	1	13.14	0.994513
Interactor Htt	Synd	repoGS> Htt-548-128Q / Synd[EP877]	1	14.13	1.06944
Interactor Htt	Taf4	repoGS> Htt-548-128Q / Taf4[EY02856]	2	13.53	1.03043	0.0219836
Kynurenine pathway	Kyat	repoGS> Htt-548-128Q / Kyat {v108093}	1	11.42	0.864333
Kynurenine pathway	cn	repoGS> Htt-548-128Q / cn {v105584}	2	13.06	1.03131	0.211519
Kynurenine pathway	v	repoGS> Htt-548-128Q / v {v107798}	1	11.87	0.968692
Energy production/ mitochondria
Energy production related metabolic process	fbp	repoGS> Htt-548-128Q / fbp{v 21396}	1	11.88	0.899149
Energy production related metabolic process	Gapdh1	repoGS> Htt-548-128Q / Gapdh1[EP-G2285]	1	12.09	0.915043
Energy production related metabolic process	Gapdh1	repoGS> Htt-548-128Q / Gapdh1{TRiP.GL01094}	2	11.84	0.97039	0.00573149
Energy production related metabolic process	GlyP	repoGS> Htt-548-128Q / GlyP[EY22899]	1	12.57	0.951372
Energy production related metabolic process	GlyP	repoGS> Htt-548-128Q / GlyP{TRiP.HMS00032}	1	11.68	0.992684
Energy production related metabolic process	Mdh1	repoGS> Htt-548-128Q / Mdh1[EY08761]	1	13.87	1.17881
Energy production related metabolic process	Mdh1	repoGS> Htt-548-128Q / Mdh1 {v41437}	2	16.385	1.24011	0.161089
Energy production related metabolic process	Nc73EF	repoGS> Htt-548-128Q / Nc73EF {v107713}	1	13.73	1.03917
Energy production related metabolic process	Pfk	repoGS> Htt-548-128Q / Pfk{v 105666}	1	12.47	0.943803
Energy production related metabolic process	Pgi	repoGS> Htt-548-128Q / Pgi {v103616}	1	11.24	0.85071
Energy production related metabolic process	PyK	repoGS> Htt-548-128Q / Pyk {v49533}	1	14.41	1.09063
Energy production related metabolic process	Pyk	repoGS> Htt-548-128Q / PyK{TRiP.GL00099}	4	17.7125	1.43529	0.110325
Energy production related metabolic process	SdhA	repoGS> Htt-548-128Q / SdhA [EY04441]	1	13.34	1.00965
Energy production related metabolic process	SdhB	repoGS> Htt-548-128Q / SdhB [EY12081]	2	14.605	1.10539	0.0305053
Mitochondrial fission	Drp1	repoGS> Htt-548-128Q / Drp1 {v44155}	1	11.83	0.895364
Mitochondria biogenesis	srl	repoGS> Htt-548-128Q / srl[EY05931]	2	19.055	1.49612	0.0141847
Calcium signaling & CREB pathway
Calcium signaling & regulation	CanA1	repoGS> Htt-548-128Q / CanA1 {v32284}	1	14.4	1.08988
Calcium signaling & regulation	CanA-14F	repoGS> Htt-548-128Q / CanA-14F {TRiP.HMS01880}	1	12.17	0.921098
Calcium signaling & regulation	CanA-14F	repoGS> Htt-548-128Q / CanA-14F {v30105}	1	13.24	1.00208
Calcium signaling & regulation	CanB	repoGS> Htt-548-128Q / CanB {v21611}	1	12.85	0.972564
Calcium signaling & regulation	Hsc70-5	repoGS> Htt-548-128Q / Hsc70-5{v 106236}	1	10	0.756859
Calcium signaling & regulation	itpr	repoGS> Htt-548-128Q / itpr{TRiP.JF01957}	1	13.07	1.11082
Calcium signaling & regulation	MCU	repoGS> Htt-548-128Q / MCU[KG02867]	1	11.67	0.883255
Calcium signaling & regulation	MCU	repoGS> Htt-548-128Q / MCU{TRiP.HMS01927}	1	12.57	1.06832
Calcium signaling & regulation	MICU1	repoGS> Htt-548-128Q / MICU1{TRiP.HMS02302}	1	11.88	1.00968
Calcium signaling & regulation	Orai	repoGS> Htt-548-128Q / Orai[MI00110]	1	12.84	0.971807
Calcium signaling & regulation	Orai	repoGS> Htt-548-128Q / Orai{TRiP.HMC03562}	1	12.2	1.03688
Calcium signaling & regulation	Orai	repoGS> Htt-548-128Q / Orai[EY01467]	1	12.32	1.04708
Calcium signaling & regulation	Orai	repoGS> Htt-548-128Q / Orai[k11505]	1	15.37	1.16329
Calcium signaling & regulation	RyR	repoGS> Htt-548-128Q / RyR {TRiP.HM05130}	1	11.92	1.01308
Calcium signaling & regulation	RyR	repoGS> Htt-548-128Q / RyR {TRiP.JF03381}	1	13.03	1.10742
Calcium signaling & regulation	SERCA	repoGS> Htt-548-128Q / SERCA[Kum170]	1	12.45	0.94229
Calcium signaling & regulation	SERCA	repoGS> Htt-548-128Q / SERCA {TRiP.HMS02878}	1	16.37	1.39129
Calcium signaling & regulation	SERCA	repoGS> Htt-548-128Q / SERCA{TRiP.JF01948}	2	18.885	1.60504	0.0691116
Calcium signaling & regulation	Stim	repoGS> Htt-548-128Q / UAS-Stim.RNAi.E}26-1	1	13.2	0.999054
Calcium signaling & regulation	Stim	repoGS> Htt-548-128Q / Stim{TRiP.JF02567}	1	12.35	1.04963
CREB pathway	CrebA	repoGS> Htt-548-128Q / CrebA{TRiP.HMJ02218}	1	11.03	0.834816
CREB pathway	CrebA	repoGS> Htt-548-128Q / CrebA[EY13494]	1	13.94	1.06855
CREB pathway	CrebB	repoGS> Htt-548-128Q / CrebB{TRiP.JF02494}	1	8.69	0.657711
CREB pathway	CrebB	repoGS> Htt-548-128Q / UAS-CrebB-a.cor	2	13.505	1.06957	0.0881653
CREB pathway	CrebB	repoGS> Htt-548-128Q / UAS-CrebB-17A-a.cor	1	13.87	1.09793
CREB pathway	Crtc	repoGS> Htt-548-128Q / Crtc{TRiP.HMJ02217}	1	11.57	0.875686
CREB pathway	Crtc	repoGS> Htt-548-128Q / Crtc[EY00004]	1	13.35	1.02332
dCBP
dCBP	nej	repoGS> Htt-548-128Q Foxo[D94] / nej {v46534}, Foxo[D94]	2	10.745	0.843894	0.00106503
dCBP	nej	repoGS> Htt-548-128Q / UAS-nej.wt-V5	1	12.29	0.942069
dCBP	nej	repoGS> Htt-548-128Q / nej[EP1179]	1	13.11	0.992242
dCBP	nej	F-repoGS> Htt-548-128Q / nej[EP1179]	1	15.66	1.08844
dCBP	nej	repoGS> Htt-548-128Q / P{y[t7.7]=nej[+t16]}Tr42	1	14.46	1.10841
dCBP	nej	repoGS> Htt-548-128Q / UAS-nej.F2161A-V5	3	14.89	1.14862	0.113579
dCBP	nej	repoGS> Htt-548-128Q / UAS-nej.siRNA_hp12	1	14.72	1.40399
dCBP	nej	repoGS> Htt-548-128Q / UAS-nej.siRNA_hp12.3	5	17.998	1.42346	0.133337
dCBP	nej	repoGS> Htt-548-128Q / nej{TRiP.HMS01507}	7	19.3029	1.48768	0.173824
dCBP	nej	repoGS> Htt-548-128Q / nej {v102885}	1	19.86	1.50312
dCBP	nej	F-repoGS> Htt-548-128Q / UAS-nej.siRNA_hp12.3	1	20.55	1.53765
dCBP	nej	repoGS> Htt-548-128Q, p53[5a1.4]/ nej {v46534}, p53[5a1.4]	1	21.83	1.78151
dCBP	nej	repoGS> Htt-548-128Q / nej {v46534}	6	23.4483	1.79981	0.204234
dCBP	nej	repoGS> Htt-548-128Q / nej {v46534}, Foxo[D94]	2	23.49	1.84624	0.0538831
dCBP	nej	F-repoGS> Htt-548-128Q / UAS-nej.siRNA_hp12	3	25.0833	1.88477	0.228429
Insulin pathway
Insulin pathway	Foxo	repoGS> Htt-548-128Q, Foxo[D94]/ Foxo[D94]	2	9.85	0.771003	0.0966673
Insulin pathway	Foxo	repoGS> Htt-548-128Q, Foxo[D94] / w	2	10.47	0.82391	0.0616426
Insulin pathway	Foxo	F-repoGS> Htt-548-128Q / UAS-FOXO	1	16.26	1.29107
Insulin pathway	Foxo	repoGS> Htt-548-128Q / UAS-FOXO-TM	1	18.85	1.49672
Insulin pathway	Foxo	repoGS> Htt-548-128Q / UAS-FOXO	1	20.14	1.59915
Insulin pathway	InR	repoGS> Htt-548-128Q / UAS-INR[K1409A]	1	18.82	1.49434
Insulin pathway	Pdk1	repoGS> Htt-548-128Q / Pdk1 {TRiP.HMS01250}	2	10.01	0.804639	0.0173402
Insulin pathway	Pten	repoGS> Htt-548-128Q / UAS-PTEN	1	17.41	1.38239
Wnt signaling
Wnt signaling	Apc	repoGS> Htt-548-128Q / Apc {TRiP.HM05070}	2	12.1	0.972641	0.0209607
Wnt signaling	arm	repoGS> Htt-548-128Q / arm {v107344}	3	13.7733	1.05722	0.0567149
Wnt signaling	Axn	repoGS> Htt-548-128Q / Axn {TRiP.HMJ23888}	2	10.83	0.870554	0.0187607
Wnt signaling	Axn	repoGS> Htt-548-128Q / UAS-Axn.GFP	3	16.64	1.2992	0.0446305
Wnt signaling	CtBP	repoGS> Htt-548-128Q / CtBP[EY03427]	2	11.98	0.962995	0.0207528
Wnt5 receptor	drl	repoGS> Htt-548-128Q / UAS-drl [RNAi]	1	8.96	0.678146
Wnt5 receptor	drl	repoGS> Htt-548-128Q / UAS-drl-WT-myc	1	10.31	0.780322
Wnt5 receptor	drl	repoGS> Htt-548-128Q / UAS-drl [RNAi], UAS Dicer2	1	10.5	0.794702
Wnt5 receptor	Drl-2	repoGS> Htt-548-128Q / UAS-drl2-WT-myc	1	9.41	0.712204
Wnt5 receptor	Drl-2	repoGS> Htt-548-128Q / UAS-drl 2[RNAi]	1	10.67	0.807569
Wnt signaling	Gint3	repoGS> Htt-548-128Q / Gint3{v39000}	1	17.5	1.3245
Wnt signaling	gro	repoGS> Htt-548-128Q / gro{TRiP.HMS01506}	2	9.78	0.786151	0.0169418
Wnt signaling	gro	repoGS> Htt-548-128Q / gro {v6315}	1	10.75	0.813624
Wnt signaling	kto	repoGS> Htt-548-128Q / kto {TRiP.HMS01062}	3	24.2233	1.93597	0.202978
Wnt signaling	pan	repoGS> Htt-548-128Q / pan {TRiP.HMS02015}	1	12	1.01988
Wnt signaling	pan	repoGS> Htt-548-128Q / UAS-pan.dTCF	3	17.3767	1.39421	0.0886538
Wnt signaling	pan	repoGS> Htt-548-128Q / UAS-pan.dTCFDeltaN	4	25.5225	1.8847	0.41743
Wnt signaling	pygo	repoGS> Htt-548-128Q / pygo {v100724}	2	16.675	1.26206	0.131119
Wnt signaling	skd	repoGS> Htt-548-128Q / skd {TRiP.HMS01305}	3	15.24	1.21882	0.0215556
Wnts	Wnt4	repoGS> Htt-548-128Q / UAS-Wnt4	1	12.13	0.91807
Wnts	Wnt5	repoGS> Htt-548-128Q / UAS-Wnt5	1	11.88	0.899149
Signal transduction
Signal transduction	alph	repoGS> Htt-548-128Q / alph{TRiP.JF01192}	2	15.08	1.25154	0.285543
Signal transduction	aop	repoGS> Htt-548-128Q / aop{TRiP.HMS01256}	2	12.795	1.04823	0.0232667
Signal transduction	Cdk5	repoGS> Htt-548-128Q / Cdk5{TRiP.JF02667}	1	14.63	1.2434
Signal transduction	cdk5alpha	repoGS> Htt-548-128Q / cdk5alpha{TRiP.JF02374}	1	12.32	1.04708
Signal transduction	CG13994	repoGS> Htt-548-128Q / CG13994[G19504]	2	18.705	1.58974	0.162863
Signal transduction	csw	repoGS> Htt-548-128Q / csw {v108352}	1	12.7	1.03643
Signal transduction	dos	repoGS> Htt-548-128Q / dos [EY04266]	1	12.6	0.953643
Signal transduction	drk	repoGS> Htt-548-128Q / drk[s-387]	2	17.31	1.31012	0.0203368
Signal transduction	flw	repoGS> Htt-548-128Q / flw {TRiP.HMS01803}	2	11.49	0.976536	0.0144233
Signal transduction	ksr	repoGS> Htt-548-128Q / ksr {v45041}	1	10.9	0.824976
Signal transduction	MKP-4	repoGS> Htt-548-128Q / MKP-4 {v104884}	1	11.92	0.972773
Signal transduction	mts	repoGS> Htt-548-128Q / mts {TRiP.HMS01804}	1	9.34	0.793807
Signal transduction	mts	repoGS> Htt-548-128Q / mts (TRiP.JF02805)	1	11.33	0.924624
Signal transduction	NiPp1	repoGS> Htt-548-128Q / UAS-NiPp1.HA	2	11.915	1.01266	0.0691116
Signal transduction	Pka-R2	repoGS> Htt-548-128Q / Pka-R2[EY11550]	1	13.63	1.11232
Signal transduction	pnt	repoGS> Htt-548-128Q / pnt {TRiP.JF02227}	1	13.17	1.04252
Signal transduction	Pp1-87B	repoGS> Htt-548-128Q / Pp1-87B {TRiP.HMS00409}	4	9.54	0.789592	0.067622
Signal transduction	Pp1-87B	repoGS> Htt-548-128Q / UAS-Pp1-87B.HA	2	11.07	0.94084	0.115386
Signal transduction	Ptpa	repoGS> Htt-548-128Q / Ptpa {v41913}	3	14.5567	1.13322	0.151082
Signal transduction	PTP-ER	repoGS> Htt-548-128Q / PTP-ER [TRiP.HMS00350]	2	12.305	1.02421	0.0253551
Signal transduction	Sos	repoGS> Htt-548-128Q / Sos[TRiP.HMS00149]	2	12.065	1.00425	0.0235729
Signal transduction	spi	repoGS> Htt-548-128Q / spi[EY14184]	1	12.26	0.927909
Signal transduction	tws	repoGS> Htt-548-128Q / tws {TRiP.GL00670}	1	12.62	1.07257
Signal transduction	wdb	repoGS> Htt-548-128Q / wdb {TRiP.GL00672}	1	13.92	1.18306
Signal transduction	wrd	repoGS> Htt-548-128Q / wrd {TRiP.GL00671}	1	12.49	1.06153
Others
Others-Adenosine signaling	Adgf-A	repoGS> Htt-548-128Q / Adgf-A[MI10657]	1	13.15	0.99527
Others-Adenosine signaling	Adgf-A	repoGS> Htt-548-128Q / Adgf-A[d11616]	1	13.52	1.02327
Others-Adenosine signaling	AdoR	repoGS> Htt-548-128Q / AdoR[MI01202-GFSTF.1]	1	11.7	0.885525
Others-Adenosine signaling	AdoR	repoGS> Htt-548-128Q / Ador{TRiP.HMC03684}	1	12.92	0.977862
Others-Adenosine signaling	Atf-2	repoGS> Htt-548-128Q / Atf-2{TRiP.HMC05118}	1	12.38	0.936992
Others-Adenosine signaling	Ent2	repoGS> Htt-548-128Q / Ent2[G2741]	1	11.81	0.893851
Others-Gene silencing by RNA	aub	repoGS> Htt-548-128Q / aub{v 106999}	2	15.31	1.15875	0.0428144
Others-Gene silencing by RNA	piwi	repoGS> Htt-548-128Q / piwi {v101658}	1	11.64	0.880984
Others-glial activation pathway	ced-6	repoGS> Htt-548-128Q / ced-6{v108101}	1	10.86	0.821949
Others-glial activation pathway	drpr	repoGS> Htt-548-128Q / drpr{TRiP.HMS01623}	1	11.62	0.987584
Others-glial activation pathway	Shark	repoGS> Htt-548-128Q / Shark {TRiP.JF01794}	1	11.86	0.967876
Others-Immunity_Inflammation	akirin	repoGS> Htt-548-128Q / akirin{TRiP.HMS01010}	1	11.99	1.01903
Others-Immunity_Inflammation	Rel	repoGS> Htt-548-128Q / Rel {TRiP.HM05154}	1	10.71	0.810596
Others-Immunity_Inflammation	Rel	repoGS> Htt-548-128Q / UAS-Rel	3	11.2433	0.850962	0.0585495
Others-Immunity_Inflammation	Rel	repoGS> Htt-548-128Q / Rel {v49414}	1	15.05	1.13907
Others-Immunity_Inflammation	Tspo	repoGS> Htt-548-128Q / TSPO{v106470}	1	12.33	0.933207
Others-Immunity_Inflammation	upd3	F-repoGS> Htt-548-128Q / upd3[Delta]	1	12.8	0.85557
Others-Immunity_Inflammation	upd3	repoGS> Htt-548-128Q / upd3{TRiP.HM05061}	1	12.16	0.920341
Others-Immunity_Inflammation	upd3	repoGS> Htt-548-128Q / upd3[Delta]	1	14.68	1.11107
Others-kynurenine pathway	Kyat	repoGS> Htt-548-128Q / Kyat {v108093}	1	11.42	0.864333
Others-Kyurenine pathway	cn	repoGS> Htt-548-128Q / cn {v105584}	2	13.06	1.03131	0.211519
Others-Kyurenine pathway	v	repoGS> Htt-548-128Q / v {v107798}	1	11.87	0.968692
Others-Metabolism	AMPKalpha	repoGS> Htt-548-128Q / AMPKalpha {v1827}	2	12.26	0.927909	0.00107036
Others-Metabolism	CG1640	repoGS> Htt-548-128Q / CG1640 {v32681}	1	11.84	0.896121
Others-Metabolism	Gad1	repoGS> Htt-548-128Q / Gad1 {v32344}	1	11.26	0.852223
Others-Metabolism	Gbs-70E	repoGS> Htt-548-128Q / Gbs-70E[EY10816]	1	13.22	1.12357
Others-Metabolism	GlyS	repoGS> Htt-548-128Q / GlyS{v35136}	1	13.39	1.01343
Others-Metabolism	Gs1	repoGS> Htt-548-128Q / Gs1 {v40174}	1	11.73	0.887796
Others-Metabolism	Gs2	repoGS> Htt-548-128Q / Gs2 {TRiP.HMS02197}	1	12.25	1.04113
Others-Metabolism	Gs2	repoGS> Htt-548-128Q / Gs2 {v32929}	2	15.415	1.1667	0.097938
Others-Metabolism	Ldh	repoGS> Htt-548-128Q / Ldh {v31192}	1	12.03	0.910502
Others-Pvr pathway	Pvf2	repoGS> Htt-548-128Q / Pvf2{TRiP.HMJ23540}	1	11.17	0.845412
Others-Pvr pathway	Pvf2	repoGS> Htt-548-128Q / Pvf2[c06947]	1	13.48	1.02025
Others-Pvr pathway	Pvf2	repoGS> Htt-548-128Q / Pvf2[d02444]	1	15.76	1.19281
Others-Pvr pathway	Pvr	repoGS> Htt-548-128Q / UAS-Pvr.lambda-mP1	1	11.05	0.836329
Others-Pvr pathway	Pvr	repoGS> Htt-548-128Q / UAS-Pvr.DN-D1	1	11.56	0.874929
Others-Pvr pathway	Pvr	repoGS> Htt-548-128Q / UAS-Pvr.D-8	1	11.98	0.906717
Others-Pvr pathway	Pvr	repoGS> Htt-548-128Q / Pvr[MI04181]	1	12.34	0.933964
Others-stress granules & RNA splicing	caz	repoGS> Htt-548-128Q / caz{TRiP.HMS00156}	2	12.265	1.0424	0.0390631
Others-stress granules & RNA splicing	Rox8	repoGS> Htt-548-128Q / Rox8[EY04187]	2	12.42	0.940019	0.104895
Others-Transporters	CG1607	repoGS> Htt-548-128Q / CG1607 {v105677}	1	14.25	1.07852
Others-Transporters	CG30394	repoGS> Htt-548-128Q / CG30394 {v3470}	2	14.79	1.11939	0.114529
Others-Transporters	gb	repoGS> Htt-548-128Q / gb {v1262}	1	13.22	1.00057
Others-Transporters	gb	repoGS> Htt-548-128Q / gb {v1261}	3	13.37	1.01192	0.0572368
Others-Transporters	GC1	repoGS> Htt-548-128Q / GC1{TRiP.HMS01235}	1	9.84	0.744749
Others-Transporters	GC1	repoGS> Htt-548-128Q / GC1 {v106319}	1	11.74	0.888553
Others-Transporters	GC1	repoGS> Htt-548-128Q / GC1[EY03020]	1	13.64	1.03236
Others-Transporters	JhI-21	repoGS> Htt-548-128Q / JhI-21 {v108509}	1	14.34	1.08534
Others-Transporters	mnd	repoGS> Htt-548-128Q / mnd[EY00526]	1	11.69	0.884768
Others-Transporters	sbm	repoGS> Htt-548-128Q / sbm {v45178}	1	13.16	0.996027
Others-Transporters	Sh	F-repoGS> Htt-548-128Q / Sh[mns]	1	9.81	0.734033
Others-Transporters	Sh	repoGS> Htt-548-128Q / Sh [TRiP.HMC03576]	1	12.5	0.946074
Others-Transporters	Sh	F-repoGS> Htt-548-128Q / Sh[MI12290]	1	14.22	1.06401
Others-Transporters	zyd	repoGS> Htt-548-128Q / UAS-zyd	2	12.99	0.98316	0.155202
Others	bru2	repoGS> Htt-548-128Q / bru2 {TRiP.HMC02994}	1	9.87	0.805475
Others	Ccn	repoGS> Htt-548-128Q / Ccn [EY07571]	1	10.87	0.822706
Others	CG12299	repoGS> Htt-548-128Q / CG12299{v102146}	1	13.16	0.996027
Others	CG1673	repoGS> Htt-548-128Q / CG1673{TRiP.HMS01832}attP2	1	12.85	0.972564
Others	CG1673	F-repoGS> Htt-548-128Q / CG1673[EP1023]	1	15.71	1.09191
Others	CG12299	repoGS> Htt-548-128Q / CG12299 {TRiP.HMS00912}	2	11.43	0.918784	0.0198001
Others	Mgstl	repoGS> Htt-548-128Q / Mgstl [TRiP.HMC04783]	1	12.59	0.952886
Others	PICK1	repoGS> Htt-548-128Q / PICK1 {v22269}	1	13.2	1.07723
Others	Rbfox1	repoGS> Htt-548-128Q / Rbfox1{v 110518}	2	14.075	1.06528	0.358036
Others	rtp	repoGS> Htt-548-128Q / rtp{v 109000}	1	14.35	1.08609
Others	kis	repoGS> Htt-548-128Q / kis {TRiP.GL00557}	2	14.4	1.15752	0.024945
Others	Sirt6	repoGS> Htt-548-128Q / Sirt6[G5116]	1	14.67	1.11031
Others	Thd1	repoGS> Htt-548-128Q / Thd1 {TRiP.GL01271}	2	9.85	0.791778	0.0170631
Others	vvl	repoGS> Htt-548-128Q / vvl {TRiP.HMC03058}	2	9.35	0.751586	0.0161969
Others	sens-2	repoGS> Htt-548-128Q / sens-2 {TRiP.HMS01394}	2	9.07	0.729079	0.0157119
