# Supplementary material for: Genetic Screen in Adult Drosophila Reveals That dCBP Depletion in Glial Cells Mitigates Huntington Disease Pathology through a Foxo-Dependent Pathway
Source: Int J Mol Sci. 2021 Apr 9;22(8):3884. doi: 10.3390/ijms22083884 (PMC8069648; doi:10.3390/ijms22083884)
Supplement: Supplementary file 1 [file ijms-22-03884-s001.zip › ijms-1110775-sup-original/Tab S3.xlsx]

## Sheet: Feuil1
Type	Gene	Genotype	LOF/GOF	Ratio to control
ENHANCERS
polyQ modifier	Atx2	repoGS> Htt-548-128Q / Atx2{v108843}	LOF	0.803784
Others	bru2	repoGS> Htt-548-128Q / bru2 {TRiP.HMC02994}	LOF	0.805475
Others	Ccn	repoGS> Htt-548-128Q / Ccn [EY07571]	LOF	0.822706
Others-glial activation pathway	ced-6	repoGS> Htt-548-128Q / ced-6{v108101}	LOF	0.821949
Interactor Htt	CG42724	repoGS> Htt-548-128Q / CG42724{TRiP.HMS00621}	LOF	0.682573
CREB pathway	CrebB	repoGS> Htt-548-128Q / CrebB{TRiP.JF02494}	LOF	0.657711
Wnt5 receptor	drl	repoGS> Htt-548-128Q / UAS-drl [RNAi]	LOF	0.678146
Wnt5 receptor	drl	repoGS> Htt-548-128Q / UAS-drl-WT-myc	GOF	0.780322
Wnt5 receptor	Drl-2	repoGS> Htt-548-128Q / UAS-drl 2[RNAi]	LOF	0.807569
Wnt5 receptor	Drl-2	repoGS> Htt-548-128Q / UAS-drl2-WT-myc	GOF	0.712204
Insulin pathway	Foxo	repoGS> Htt-548-128Q, Foxo[D94]/ Foxo[D94]	LOF	0.771003
Others-Transporters	GC1	repoGS> Htt-548-128Q / GC1{TRiP.HMS01235}	LOF	0.744749
Wnt signaling	gro	repoGS> Htt-548-128Q / gro{TRiP.HMS01506}	LOF	0.786151
Calcium signaling & regulation	Hsc70-5	repoGS> Htt-548-128Q / Hsc70-5{v 106236}	LOF	0.756859
Signal transduction	ksr	repoGS> Htt-548-128Q / ksr {v45041}	LOF	0.824976
Signal transduction	mts	repoGS> Htt-548-128Q / mts {TRiP.HMS01804}	LOF	0.793807
Insulin pathway	Pdk1	repoGS> Htt-548-128Q / Pdk1 {TRiP.HMS01250}	LOF	0.804639
Signal transduction	Pp1-87B	repoGS> Htt-548-128Q / Pp1-87B {TRiP.HMS00409}	LOF	0.789592
Interactor Htt	Rab5	repoGS> Htt-548-128Q / Rab5{v103945}	LOF	0.476064
Others-Immunity_Inflammation	Rel	repoGS> Htt-548-128Q / Rel {TRiP.HM05154}	LOF	0.810596
Others	sens-2	repoGS> Htt-548-128Q / sens-2 {TRiP.HMS01394}	LOF	0.729079
Others-Transporters	Sh	F-repoGS> Htt-548-128Q / Sh[mns]	LOF	0.734033
Others	Thd1	repoGS> Htt-548-128Q / Thd1 {TRiP.GL01271}	LOF	0.791778
Others	vvl	repoGS> Htt-548-128Q / vvl {TRiP.HMC03058}	LOF	0.751586
SUPPRESSORS
Signal transduction	alph	repoGS> Htt-548-128Q / alph{TRiP.JF01192}	LOF	1.25154
Wnt signaling	Axn	repoGS> Htt-548-128Q / UAS-Axn.GFP	GOF	1.2992
Signal transduction	Cdk5	repoGS> Htt-548-128Q / Cdk5{TRiP.JF02667}	LOF	1.2434
Signal transduction	CG13994	repoGS> Htt-548-128Q / CG13994[G19504]	LOF	1.58974
polyQ modifier	DnaJ-1	repoGS> Htt-548-128Q / UAS-DNAJB1.K}2	GOF	1.32148
Signal transduction	drk	repoGS> Htt-548-128Q / drk[s-387]	GOF	1.31012
Insulin pathway	Foxo	repoGS> Htt-548-128Q / UAS-FOXO	GOF	1.59915
Wnt signaling	Gint3	repoGS> Htt-548-128Q / Gint3{v39000}	LOF	1.3245
polyQ modifier	Hsc70Cb	repoGS> Htt-548-128Q / UAS-Hsc70Cb.K}2	GOF	1.41381
polyQ modifier	HSP68	repoGS> Htt-548-128Q / UAS-HSP68	GOF	1.38127
Interactor Htt	Htt	repoGS> Htt-548-128Q / UAS-Htt-548-0Q	GOF	1.50691
Insulin pathway	InR	repoGS> Htt-548-128Q / UAS-INR[K1409A]	GOF	1.49434
Wnt signaling	kto	repoGS> Htt-548-128Q / kto {TRiP.HMS01062}	LOF	1.93597
Energy production related metabolic process	Mdh1	repoGS> Htt-548-128Q / Mdh1 {v41437}	LOF	1.24011
dCBP	nej	repoGS> Htt-548-128Q / nej {v46534}	LOF	1.79981
Wnt signaling	pan	repoGS> Htt-548-128Q / UAS-pan.dTCFDeltaN	LOF-DN	1.8847
Insulin pathway	Pten	repoGS> Htt-548-128Q / UAS-PTEN	GOF	1.38239
Wnt signaling	pygo	repoGS> Htt-548-128Q / pygo {v100724}	LOF	1.26206
Interactor Htt	Pyk	repoGS> Htt-548-128Q / PyK{TRiP.GL00099}	LOF	1.43529
Calcium signaling & regulation	SERCA	repoGS> Htt-548-128Q / SERCA{TRiP.JF01948}	LOF	1.60504
Wnt signaling	skd	repoGS> Htt-548-128Q / skd {TRiP.HMS01305}	LOF	1.21882
Mitochondria biogenesis	srl	repoGS> Htt-548-128Q / srl[EY05931]	GOF	1.49612
