# Supplementary material for: Genetic Screen in Adult Drosophila Reveals That dCBP Depletion in Glial Cells Mitigates Huntington Disease Pathology through a Foxo-Dependent Pathway
Source: Int J Mol Sci. 2021 Apr 9;22(8):3884. doi: 10.3390/ijms22083884 (PMC8069648; doi:10.3390/ijms22083884)
Supplement: Supplementary file 1 [file ijms-22-03884-s001.zip › ijms-1110775-sup-original/Tab S4.xlsx]

## Sheet: Feuil1
FIGURE	GRAPH LEGEND	GENOTYPE	INDUCTION
Fig. 1a
	RU0	w; UAS-Htt-548-128Q /+; repoGS/+	RU0
	RU100	w; UAS-Htt-548-128Q /+; repoGS/+	RU100
Fig. 1b
	control-sgs1	w; UAS-Htt-548-128Q /Sgs1 {v21206}; repoGS/+	RU100
	control-TRIP	w; UAS-Htt-548-128Q /+; repoGS/TRIP[JF03252]	RU100
	control-TRIP	w; UAS-Htt-548-128Q /TRiP.HMJ21651; repoGS/+	RU100
	other controls	w; UAS-Htt-548-128Q /UAS-mcd8GFP; repoGS/+	RU100
	other controls	w; UAS-Htt-548-128Q /UAS-10X-GFP; repoGS/+	RU100
	other controls	w; UAS-Htt-548-128Q /+; repoGS/+	RU100
Fig. S1
	RU0	w; repoGS/+	RU0
	RU20	w; repoGS/+	RU20
	RU100	w; repoGS/+	RU100
Fig. 2a
	control-RNAi1	w; UAS-Htt-548-128Q /Sgs1 {v21206}; repoGS/+	RU100
	UAS-Hsc70Cb	w; UAS-Htt-548-128Q /UAS-Hsc70Cb.K}2; repoGS/+	RU100
	UAS-HSP68	w; UAS-Htt-548-128Q /+; repoGS/UAS-HSP68	RU100
	UAS-DNAJB1	w; UAS-Htt-548-128Q /UAS-DNAJB1; repoGS/+	RU100
	Rab5-RNAi	w; UAS-Htt-548-128Q /Rab5{v103945}; repoGS/+	RU100
	UAS-Rab5	w; UAS-Htt-548-128Q /+; repoGS/UAS-GFP-Rab5	RU100
Fig. 2b
	control-RNAi1	w; UAS-Htt-548-128Q /Sgs1 {v21206}; repoGS/+	RU100
	HDAC1-RNAi	w; UAS-Htt-548-128Q /+; repoGS/HDAC1 [v30599]	RU100
	v-RNAi	w; UAS-Htt-548-128Q /v [v107798]; repoGS/+	RU100
	cn-RNAi	w; UAS-Htt-548-128Q /cn [v105854]; repoGS/+	RU100
Fig. 3a
	Control-RNAi1	w; UAS-Htt-548-128Q /Sgs1 {v21206}; repoGS/+	RU100
	Pyk-RNAi1	w; UAS-Htt-548-128Q /+; repoGS/Pyk [TRiP.GL00099]	RU100
	Pyk-RNAi2	w; UAS-Htt-548-128Q /Pyk [v49533]; repoGS/+	RU100
Fig. 3b
	UAS-control	w; UAS-Htt-548-128Q /UAS-mcd8GFP; repoGS/+	RU100
	Srl-GOF	w; UAS-Htt-548-128Q /+; repoGS/srl[EY05931]	RU100
Fig. S2
	Pyk-RNAi2 uninduced	w; Pyk [v49533]/+; repoGS/+	RU0
	Pyk-RNAi2 induced	w; Pyk [v49533]/+; repoGS/+	RU100
	Pyk-RNAi1 uninduced	w; repoGS/Pyk [TRiP.GL00099]	RU0
	Pyk-RNAi1 induced	w; repoGS/Pyk [TRiP.GL00099]	RU100
Fig. 4a
	Control-RNAi2	w; UAS-Htt-548-128Q /+; repoGS/TRIP[JF03252]	RU100
	Itpr-RNAi	w; UAS-Htt-548-128Q /+; repoGS/Itpr[TRiP.JF01957]	RU100
Fig. 4b
	Control-RNAi2	w; UAS-Htt-548-128Q /+; repoGS/TRIP[JF03252]	RU100
	SERCA-RNAi1	w; UAS-Htt-548-128Q /+; repoGS/SERCA[TRiP.HMS02878]	RU100
	SERCA-RNAi2	w; UAS-Htt-548-128Q /+; repoGS/SERCA[TRiP.JF01948]
Fig. 5a
	UAS-control	w; UAS-Htt-548-128Q /UAS-mcd8GFP; repoGS/+	RU100
	Control-RNAi2	w; UAS-Htt-548-128Q /TRiP.HMJ21651; repoGS/+	RU100
	CerbA-RNAi	w; UAS-Htt-548-128Q /CrebA[TRiP.HMJ02218]; repoGS/+	RU100
	CerbB-RNAi	w; UAS-Htt-548-128Q /+; repoGS/CrebB[TRiP.JF02494]	RU100
	UAS-CrebB	w; UAS-Htt-548-128Q /+; repoGS/UAS-CrebB	RU100
Fig. 5b
	Control-RNAi1	w; UAS-Htt-548-128Q /Sgs1 {v21206}; repoGS/+	RU100
	nej-RNAi1	w; UAS-Htt-548-128Q /nej[v46534]; repoGS/+	RU100
Fig. 5c
	Control-RNAi1	w; UAS-Htt-548-128Q /Sgs1 {v21206}; elavGS/+	RU100
	nej-RNAi1	w; UAS-Htt-548-128Q /nej[v46534]; elavGS/+	RU100
Fig. 6a
	Control-RNAi1	w; UAS-Htt-548-128Q /Sgs1 {v21206}; repoGS/+	RU100
	nej-RNAi1	w; UAS-Htt-548-128Q /nej[v46534]; repoGS/+	RU100
	nej-RNAi2	w; UAS-Htt-548-128Q /nej[v102885]; repoGS/+	RU100
	nej-RNAi3	w; UAS-Htt-548-128Q /+; repoGS/nej[TRiP.HMS01507]	RU100
	nej-RNAi4	w; UAS-Htt-548-128Q /+; repoGS/UAS-nej.siRNA_hp12.3	RU100
	nej-RNAi5	UAS-nej.siRNA_hp12; UAS-Htt-548-128Q /+; repoGS/+	RU100
	UAS-nej	w; UAS-Htt-548-128Q /+; repoGS/UAS-nej.wt-V5	RU100
	nej-GOF	nej[EP1179] ; UAS-Htt-548-128Q /+; repoGS/+	RU100
	F-Control-RNAi1	w; UAS-Htt-548-128Q /Sgs1 {v21206}; repoGS/+ (females)	RU100
	F-nej-RNAi4	UAS-nej.siRNA_hp12/+; UAS-Htt-548-128Q /+; repoGS/+ (females)	RU100
	F-nej-RNAi5	w; UAS-Htt-548-128Q /+; repoGS/UAS-nej.siRNA_hp12.3 (females)	RU100
	F-nej-GOF	nej[EP1179]/+ ; UAS-Htt-548-128Q /+; repoGS/+ (females)	RU100
Fig. 6b
	Control-RNAi1	w; UAS-Htt-548-128Q /Sgs1 {v21206}; repoGS/+	RU100
	nej-RNAi1	w; UAS-Htt-548-128Q /nej[v46534]; repoGS/+	RU100
	nej-RNAi2	w; UAS-Htt-548-128Q /nej[v102885]; repoGS/+	RU100
	nej-RNAi3	w; UAS-Htt-548-128Q /+; repoGS/nej[TRiP.HMS01507]	RU100
	Control-RNAi1 uninduced	w; UAS-Htt-548-128Q /nej[v46534]; repoGS/+	RU0
Fig. S3
	Control	w	RU0
	Control-RNAi1	w; UAS- HTT-548-128Q /Sgs1 {v21206}; repoGS/+	RU100
	UAS-Control2	w; UAS- HTT-548-128Q /+; repoGS/10XUAS-IVS-GFP	RU100
	Control-RNAi3	w; UAS- HTT-548-128Q /TRiP.JF02542; repoGS/+	RU100
	nej-RNAi1	w; UAS- HTT-548-128Q /nej[v46534]; repoGS/+	RU100
	nej-RNAi4	w; UAS- HTT-548-128Q /+; repoGS/UAS-nej.siRNA_hp12.3	RU100
	nej-RNAi3	w; UAS- HTT-548-128Q /+; repoGS/nej[TRiP.HMS01507]	RU100
Fig. 7a
	Control	w; UAS-Htt-548-128Q /+; repoGS/+	RU100
	nej-RNAi1/+	w; UAS-Htt-548-128Q /nej[v46534]; repoGS/+	RU100
	p53-LOF	w; Htt-548-128Q/+; repoGS, p53[5a1.4]/ p53[5a1.4]	RU100
	nej-RNAi1; p53-LOF	w; Htt-548-128Q/+; repoGS, p53[5a1.4]/ nej {v46534}; p53[5a1.4]	RU100
Fig. 7b
	Control-RNAi1 induced	w; UAS-Htt-548-128Q /Sgs1 {v21206}; repoGS/+	RU100
	nej-RNAi1/+	w; UAS-Htt-548-128Q /nej[v46534]; repoGS/+	RU100
	nej-RNAi1/+; Foxo-LOF/+	w; UAS-Htt-548-128Q /nej[v46534]; repoGS/Foxo[D94]	RU100
	Foxo-LOF	w; UAS-Htt-548-128Q /+; repoGS, Foxo[D94] /Foxo[D94]	RU100
	nej-RNAi1/+; Foxo-LOF	w; UAS-Htt-548-128Q /nej[v46534]; repoGS, Foxo[D94] /Foxo[D94]	RU100
Fig. 7c
	UAS-control	w; UAS-Htt-548-128Q /UAS-mcd8GFP; repoGS/+	RU100
	UAS-Foxo	w; UAS-Htt-548-128Q /UAS-FOXO; repoGS/+	RU100
	UAS-Foxo-TM	w; UAS-Htt-548-128Q /UAS-FOXO-TM; repoGS/+	RU100
	UAS-Inr	w; UAS-Htt-548-128Q /UAS-INR[K1409A]; repoGS/+	RU100
	UAS-Pten	w; UAS-Htt-548-128Q /+; repoGS/UAS-PTEN	RU100
Fig. 8a
	UAS-control	w; UAS-Htt-548-128Q /+; repoGS/+	RU100
	Arm-RNAi	w; UAS-Htt-548-128Q /arm[v107344]; repoGS/+	RU100
	UAS-dTCF-DN	w; UAS-Htt-548-128Q /UAS-dTCFDeltaN; repoGS/+	RU100
	UAS-Axn	w; UAS-Htt-548-128Q /+; repoGS/UAS-Axn.GFP	RU100
Fig. 8b
	Control-RNAi1	w; UAS-Htt-548-128Q /Sgs1 {v21206}; repoGS/+	RU100
	Gint3-RNAi	w; UAS-Htt-548-128Q /+; repoGS/Gint3[v39000]	RU100
	Pygo-RNAi	w; UAS-Htt-548-128Q /pygo[v100724]; repoGS/+	RU100
	Kto-RNAi	w; UAS-Htt-548-128Q /+; repoGS/kto[TRiP.HMS01062]	RU100
	Skd-RNAi	w; UAS-Htt-548-128Q /+; repoGS/skd[TRiP.HMS01305]	RU100
	Gro-RNAi	w; UAS-Htt-548-128Q /+; repoGS/gro{TRiP.HMS01506}	RU100
